# Supplementary material for: Comparison of Synthetic Pathways for Obtaining Fluorescent Nanomaterials Based on Halloysite and Carbon Dots for Potential Biological Sensing
Source: MDPI journal article supplement (doi:10.3390/ijms25105370), 2024-05-14
Supplement: s1 [file s1]

# **Comparison of synthetic pathways for obtaining fluorescent nanomaterials based on halloysite and carbon dots for potential biological sensing**

*Marina Massaro,<sup>a</sup> Giuseppe Cinà,<sup>a</sup> Giuseppe Cavallaro,<sup>b,c</sup> Giuseppe Lazzara,<sup>b,c</sup> Alessandro Silvestri,<sup>d,e</sup> Raquel de Melo Barbosa,<sup>f</sup> Rita Sánchez-Espejo,<sup>g</sup> César Viseras-Iborra,<sup>g,h</sup> Monica Notarbartolo<sup>a</sup> and Serena Riela<sup>i,\*</sup>*

<sup>a</sup> Dipartimento di Scienze e Tecnologie Biologiche, Chimiche e Farmaceutiche (STEBICEF), Università di Palermo, Viale delle Scienze, Parco d'Orleans II, Ed. 16-17, 90128 Palermo, Italy.

<sup>b</sup> Dipartimento di Fisica e Chimica E. Segrè (DiFC), Università di Palermo, Viale delle Scienze, Parco d'Orleans II, Ed. 17, 90128 Palermo, Italy.

<sup>c</sup> Consorzio Interuniversitario Nazionale per la Scienza e Tecnologia dei Materiali (INSTM), I-50121 Firenze, Italy.

<sup>d</sup> Center for Cooperative Research in Biomaterials (CIC biomaGUNE), Basque Research and Technology Alliance (BRTA), Paseo de Miramon 194, 20014 Donostia-San Sebastián, Spain.

<sup>e</sup> Dipartimento di Scienze Molecolari e Nanosistemi, Università Ca' Foscari Venezia, Via Torino 155, 30170 Venezia Mestre, Italy (current address).

<sup>f</sup> Department of Pharmacy and Pharmaceutical Technology, School of Pharmacy, University of Seville, C/Professor García González 2, 41012, Sevilla, Spain.

<sup>g</sup> Department of Pharmacy and Pharmaceutical Technology, Faculty of Pharmacy, University of Granada, Campus Universitario de Cartuja, 18071 Granada, Spain.

<sup>h</sup> Andalusian Institute of Earth Sciences, CSIC-UGR, 18100 Armilla, Granada, Spain.

<sup>i</sup> Dipartimento di Scienze Chimiche (DSC), Università di Catania, Viale Andrea Doria 6, 95125, Catania, Italy.

*Dedicated to Prof. Maurizio Prato in occasion of his retirement.*

Total number of pages: 22

Total number of Figures: 16

Total number of Tables: 2

## Content

|                                                                                                                    |     |
|--------------------------------------------------------------------------------------------------------------------|-----|
| 1. Thermogravimetric curves of HNTs-NCD <sub>s</sub> nanomaterials.....                                            | S3  |
| 2. FT-IR spectra of HNTs-NCD <sub>s a-c</sub> nanomaterials synthesized.....                                       | S4  |
| 3. XPS survey and deconvoluted spectrum of HNTs-NCD <sub>s b-c</sub> .....                                         | S5  |
| 4. Percentage of O, C, and N atoms, as determined by XPS measurements.....                                         | S7  |
| 5. FT-IR spectra of HNTs-NH <sub>2</sub> , HNTs-COOH and HNTs-NCDs <b>1-2</b> .....                                | S8  |
| 6. Thermogravimetric curves of HNTs-NH <sub>2</sub> , HNTs-COOH and HNTs-NCDs <b>1-2</b> .....                     | S9  |
| 7. XPS survey and deconvoluted spectrum of HNTs-NCDs <b>1-2</b> and N-doped CDs.....                               | S10 |
| 8. Percentage of O, C, N and S atoms, as determined by XPS measurements.....                                       | S12 |
| 9. TEM image of N-doped CDs and statistical distribution.....                                                      | S13 |
| 10. HAADF/STEM image and EDX elemental mapping images of HNTs-NCDs <b>2</b> .....                                  | S14 |
| 11. Absorption spectra of HNTs-NCD <sub>s a-c</sub> ; PL emission spectra and Tauc Plot of HNTs-NCDs <b>2</b> .... | S15 |
| 12. PL spectra in solution of HNTs-NCD <sub>s b-c</sub> .....                                                      | S16 |
| 13. PL spectra solid state of HNTs-NCD <sub>s b-c</sub> .....                                                      | S17 |
| 14. PL spectra in solution of HNTs-NCDs <b>1</b> and HNTs-NCDs <b>2</b> .....                                      | S19 |
| 15. PL spectra solid state of HNTs-NCDs <b>1</b> and HNTs-NCDs <b>2</b> .....                                      | S20 |
| 16. References.....                                                                                                | S21 |

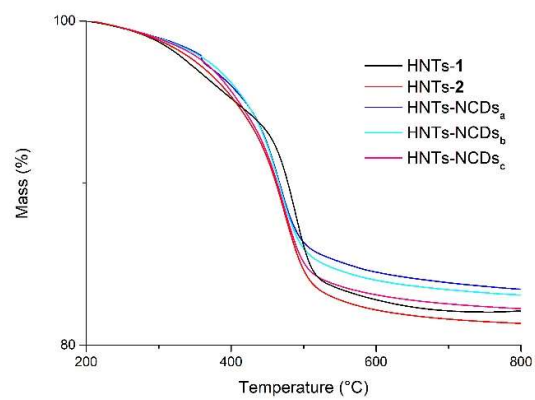

**Figure S1.** Thermogravimetric curves of HNTs-1, HNTs-2 and HNTs-NCDs<sub>a-c</sub> based nanomaterials.

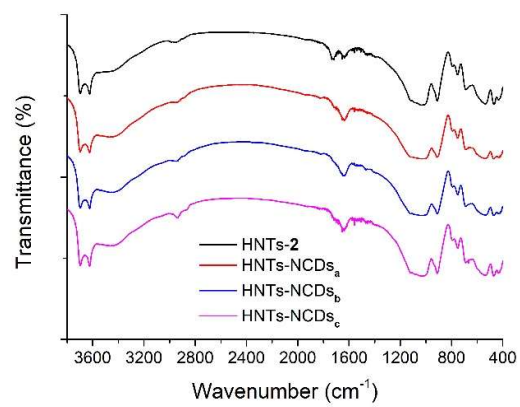

**Figure S2.** FT-IR spectra of HNTs-2 and HNTs-NCDs<sub>a-c</sub>

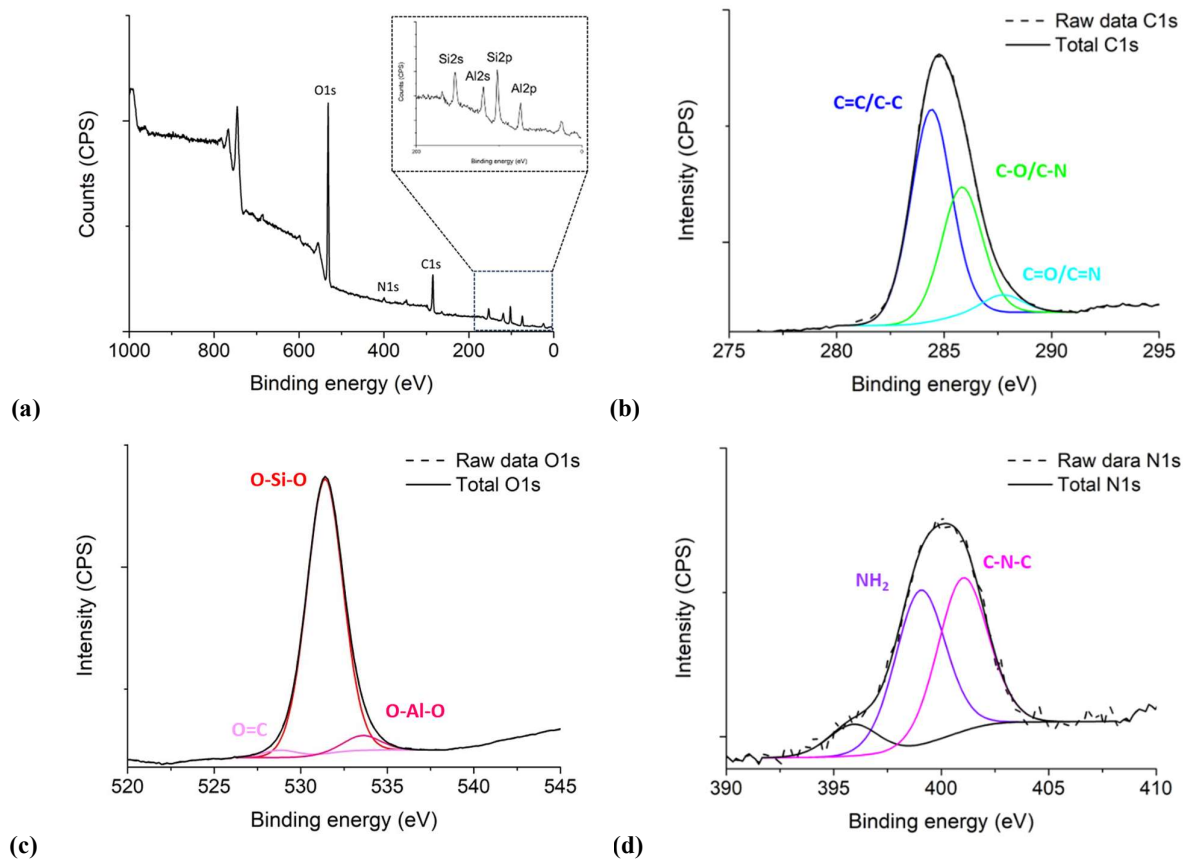

**Figure S3.** (a) XPS survey of HNTs-NCDs; (b) deconvoluted C 1s spectrum; (c) deconvoluted O 1s spectrum, (d) deconvoluted N 1s spectrum.

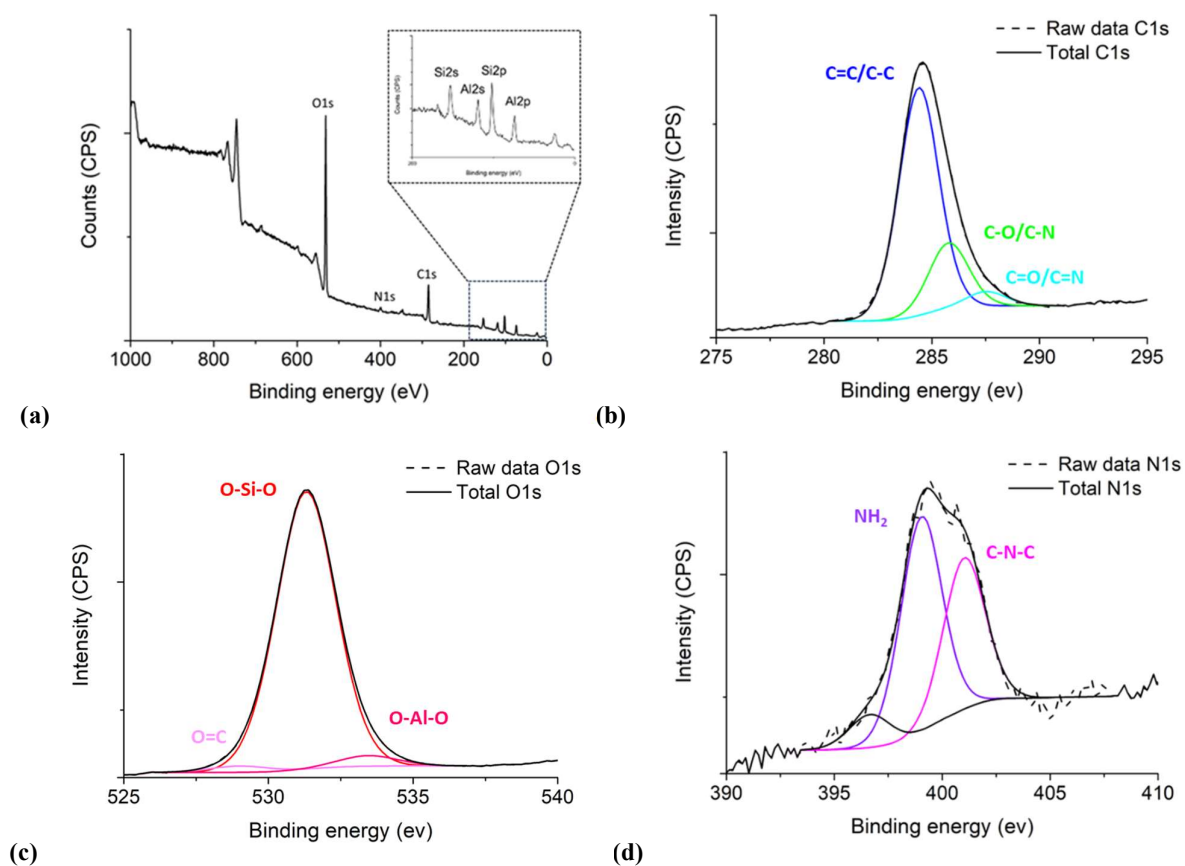

**Figure S4.** (a) XPS survey of HNTs-NCDs; (b) deconvoluted C 1s spectrum; (c) deconvoluted O 1s spectrum, (d) deconvoluted N 1s spectrum.

**Table S1.** Percentage of O, C, N and S atoms, as determined by XPS measurements.

|                       | <b>HNTs-NCDs<sub>a</sub></b> | <b>HNTs-NCDs<sub>b</sub></b> | <b>HNTs-NCDs<sub>c</sub></b> |
|-----------------------|------------------------------|------------------------------|------------------------------|
| <b>Si%</b>            | 9.8                          | 12.2                         | 10.3                         |
| <b>Al%</b>            | 12.6                         | 12.9                         | 9.5                          |
| <b>C1s %</b>          | 17.4                         | 17.8                         | 18.9                         |
| <b>C=C/C-C</b>        | 63.6                         | 59.1                         | 73.8                         |
| <b>C-O/C-N</b>        | 30.6                         | 35.9                         | 21.4                         |
| <b>C=O/C=N</b>        | 5.7                          | 4.9                          | 4.8                          |
| <b>N1s %</b>          | 2.3                          | 2.9                          | 2.3                          |
| <b>NH<sub>2</sub></b> | 67.7                         | 50.3                         | 58.9                         |
| <b>C-N-C</b>          | 32.3                         | 49.7                         | 41.1                         |
| <b>O1s %</b>          | 80.3                         | 79.3                         | 78.8                         |
| <b>O-Si-O</b>         | 93.0                         | 92.6                         | 94.3                         |
| <b>O-Al-O</b>         | 5.1                          | 5.0                          | 3.6                          |
| <b>O=C</b>            | 1.9                          | 2.4                          | 2.1                          |

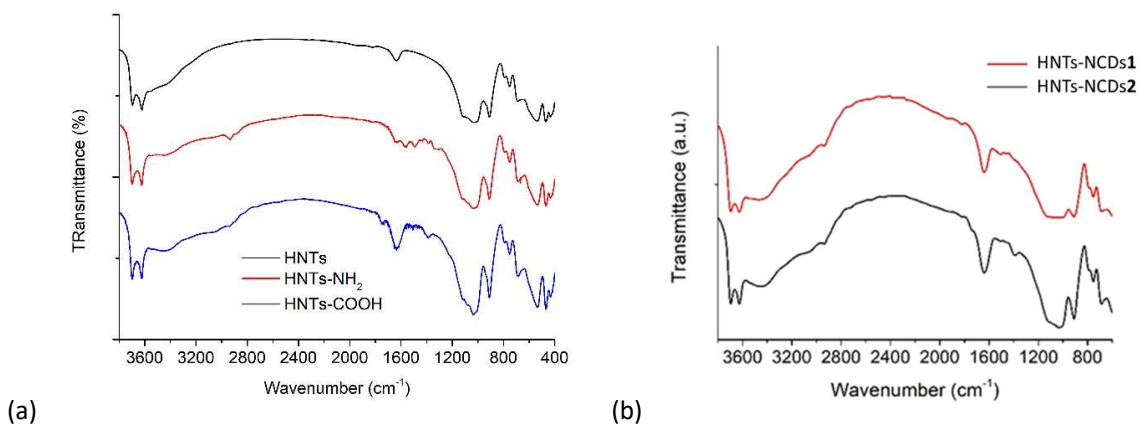

**Figure S5** (a) FT-IR spectra of HNTs, HNTs- $\text{NH}_2$  and HNTs-COOH; (b) FT-IR spectra of HNTs-NCDs1 and HNTs-NCDs2



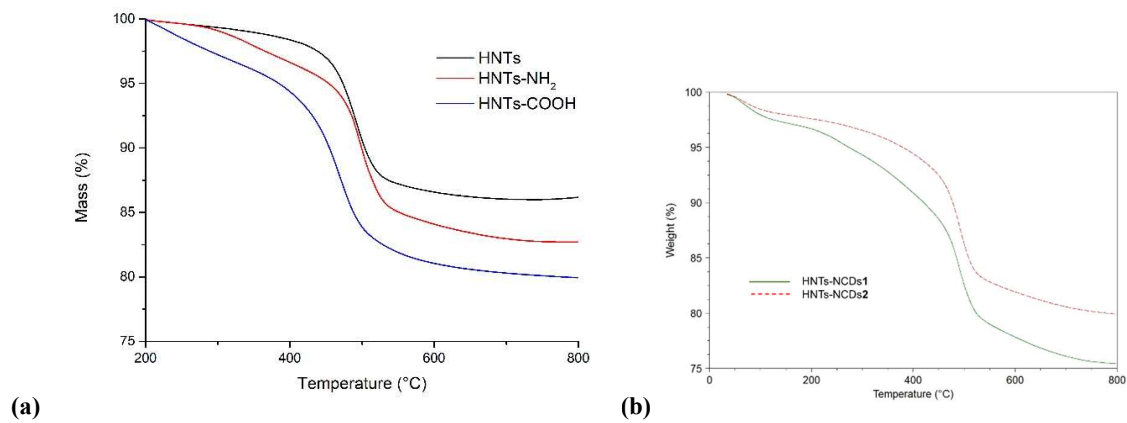

**Figure S6** (a) Thermogravimetric curves of HNTs, HNTs-NH<sub>2</sub> and HNTs-COOH and (b) HNTs-NCDs1 and HNTs-NCDs2 based nanomaterials.

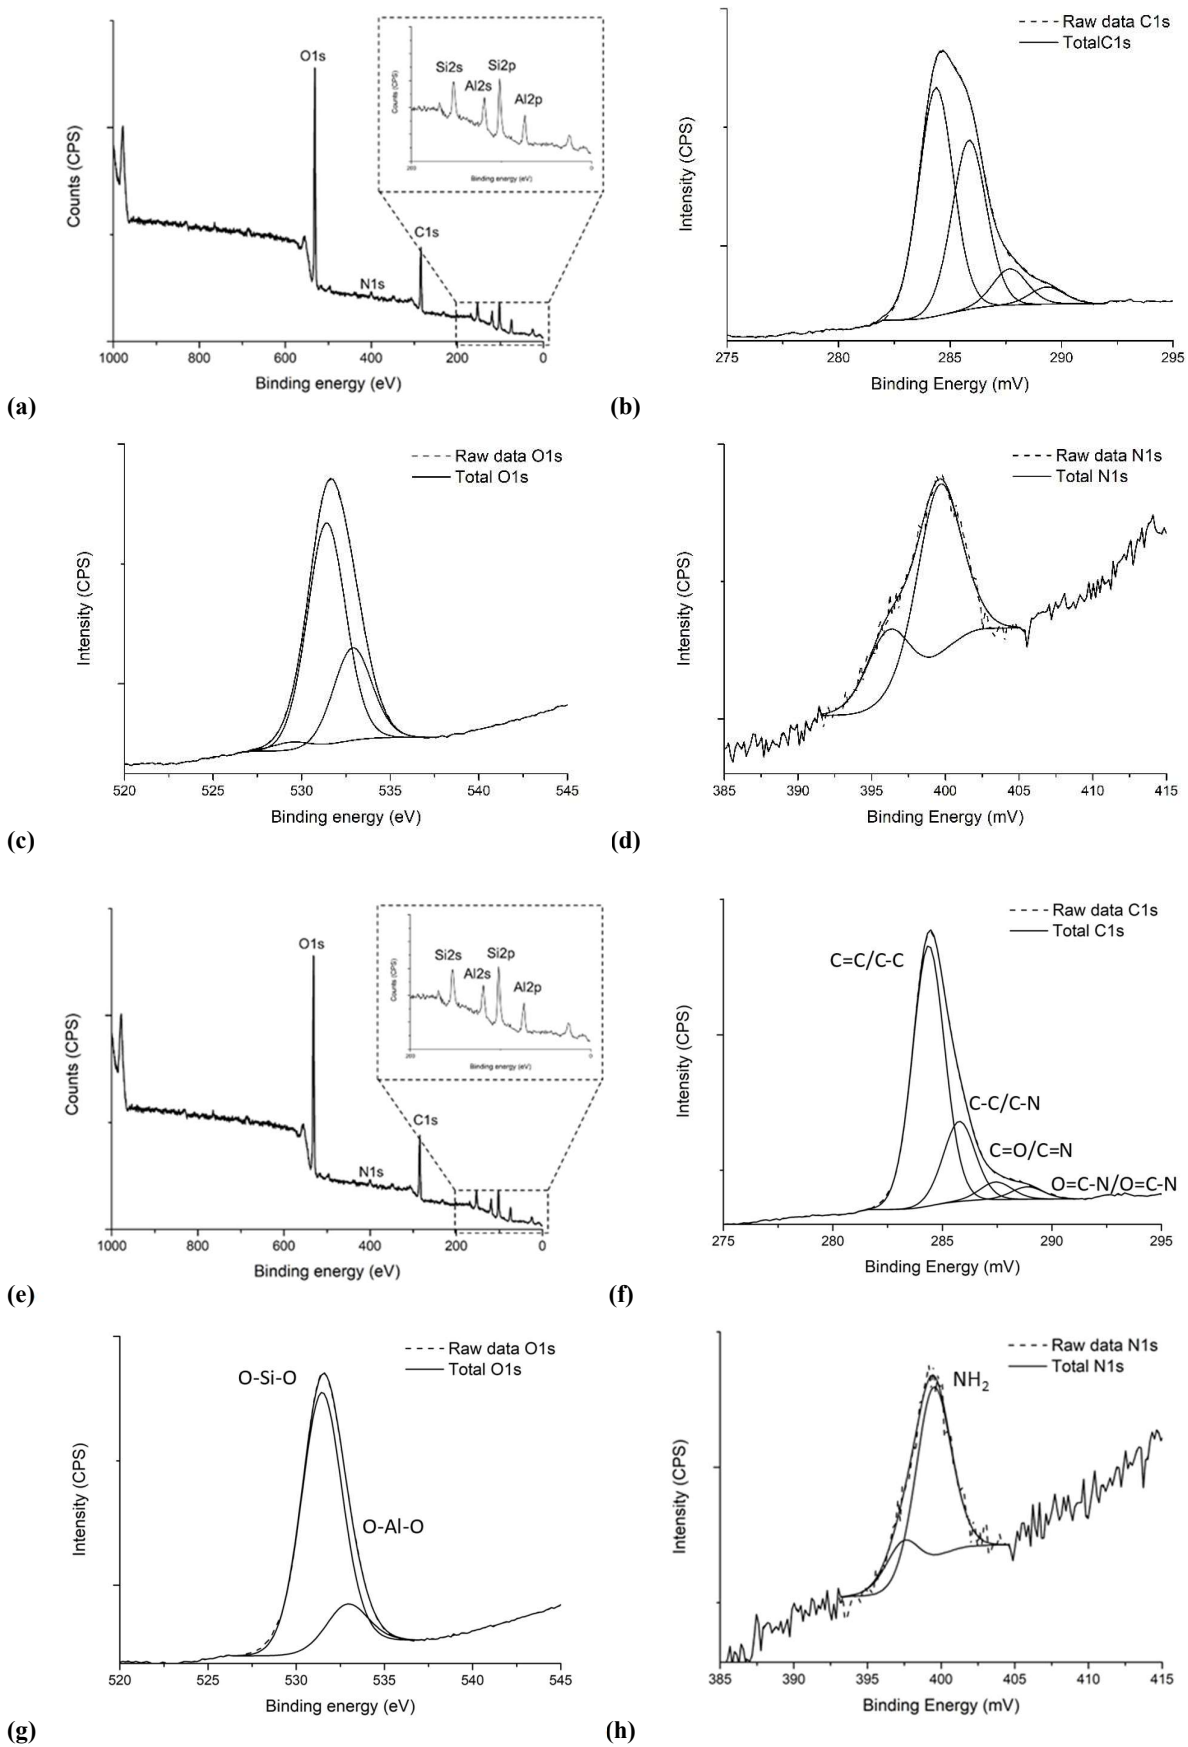

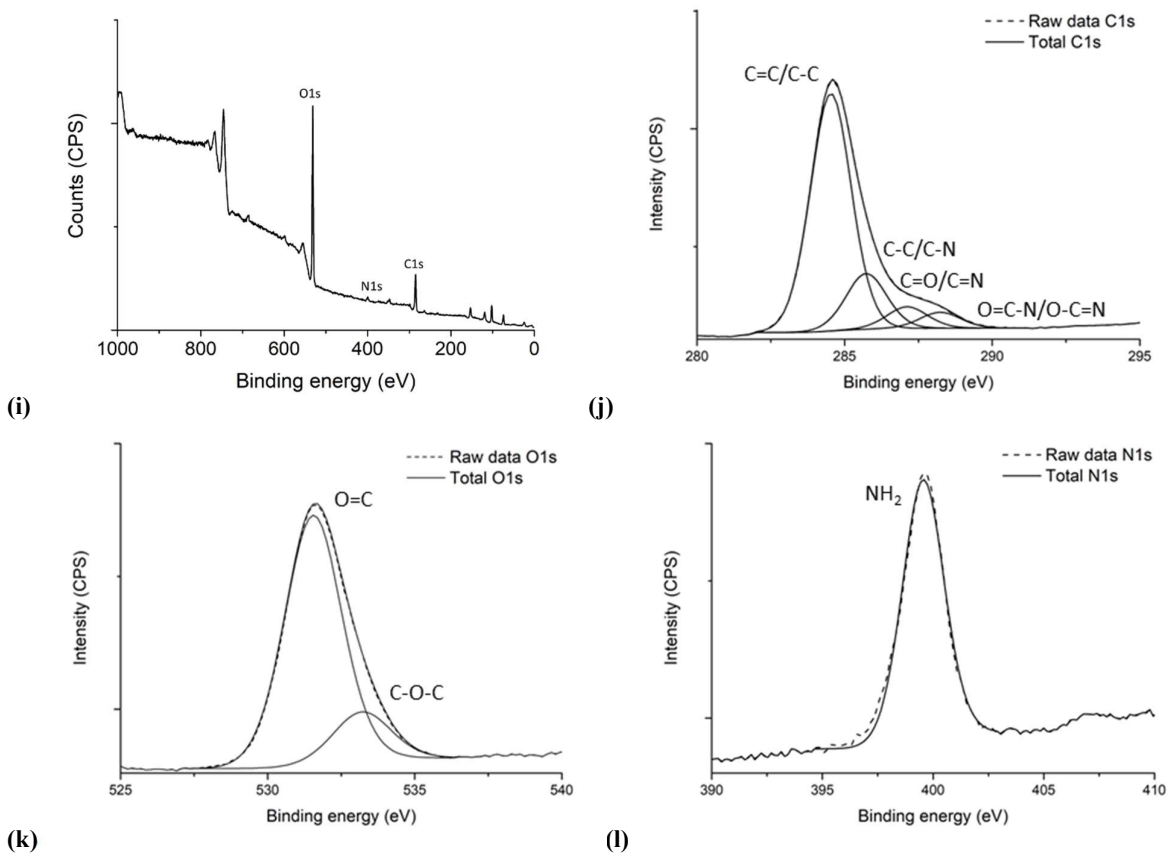

**Figure S7.** (a) XPS survey of HNTs-NCDs1 (b-d) deconvoluted C 1s, O 1s and N1s spectrum of HNTs-NCDs1 (e) XPS survey of HNTs-NCDs2 (f-h) deconvoluted C 1s, O1s and N 1s of HNTs-NCDs2 (i) XPS survey of N-doped CDs (j-l) deconvoluted C 1s, O 1s and N 1s spectrum of N-doped CDs

**Table S2.** Percentage of O, C, N and S atoms, as determined by XPS measurements

|                    | <b>N-doped CDs</b> | <b>HNTs-NCDs1</b> | <b>HNTs-NCDs2</b> |
|--------------------|--------------------|-------------------|-------------------|
| <b>Si%</b>         |                    | 1.1               | 1.4               |
| <b>Al%</b>         |                    | 13.3              | 12.3              |
| <b>C1s %</b>       | 79.0               | 56.7              | 65.3              |
| <b>C=C/C-C</b>     | 71.8               | 50.6              | 72.3              |
| <b>C-O/C-N</b>     | 16.8               | 37.5              | 21.4              |
| <b>C=O/C=N</b>     | 6.5                | 8.1               | 3.9               |
| <b>O=C-N/O-C=N</b> | 4.9                | 3.8               | 2.4               |
| <b>N1s %</b>       | 4.4                | 3.6               | 1.8               |
| <b>NH2</b>         | 100                | 70.7              | 78.7              |
| <b>O1s %</b>       | 16.6               | 39.7              | 32.9              |
| <b>O-Si-O</b>      | -                  | 68.8              | 86.8              |
| <b>O-Al-O</b>      | -                  | 28.6              | 13.2              |
| <b>O=C</b>         | 84.0               | 2.6               | -                 |
| <b>C-O-C</b>       | 16.0               | -                 | -                 |

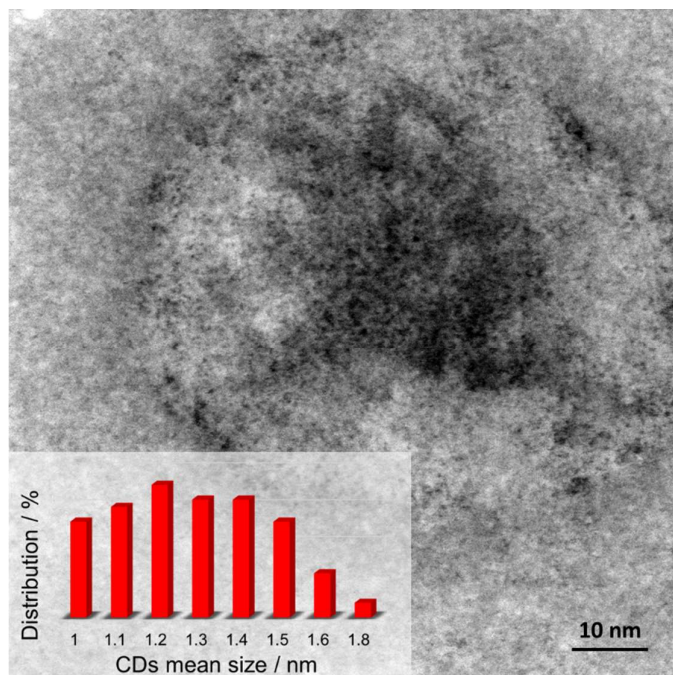

**Figure S8** TEM image of pristine N-doped CDs and statistical distribution of the mean size (n = 61).

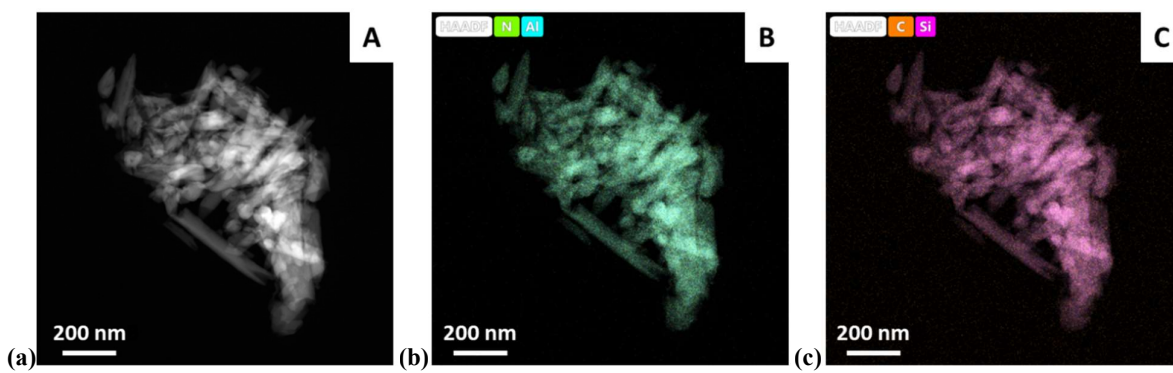

**Figure S9** (a) HAADF/STEM image of HNTs-NCDs2; (b-c) EDS elemental mapping images.

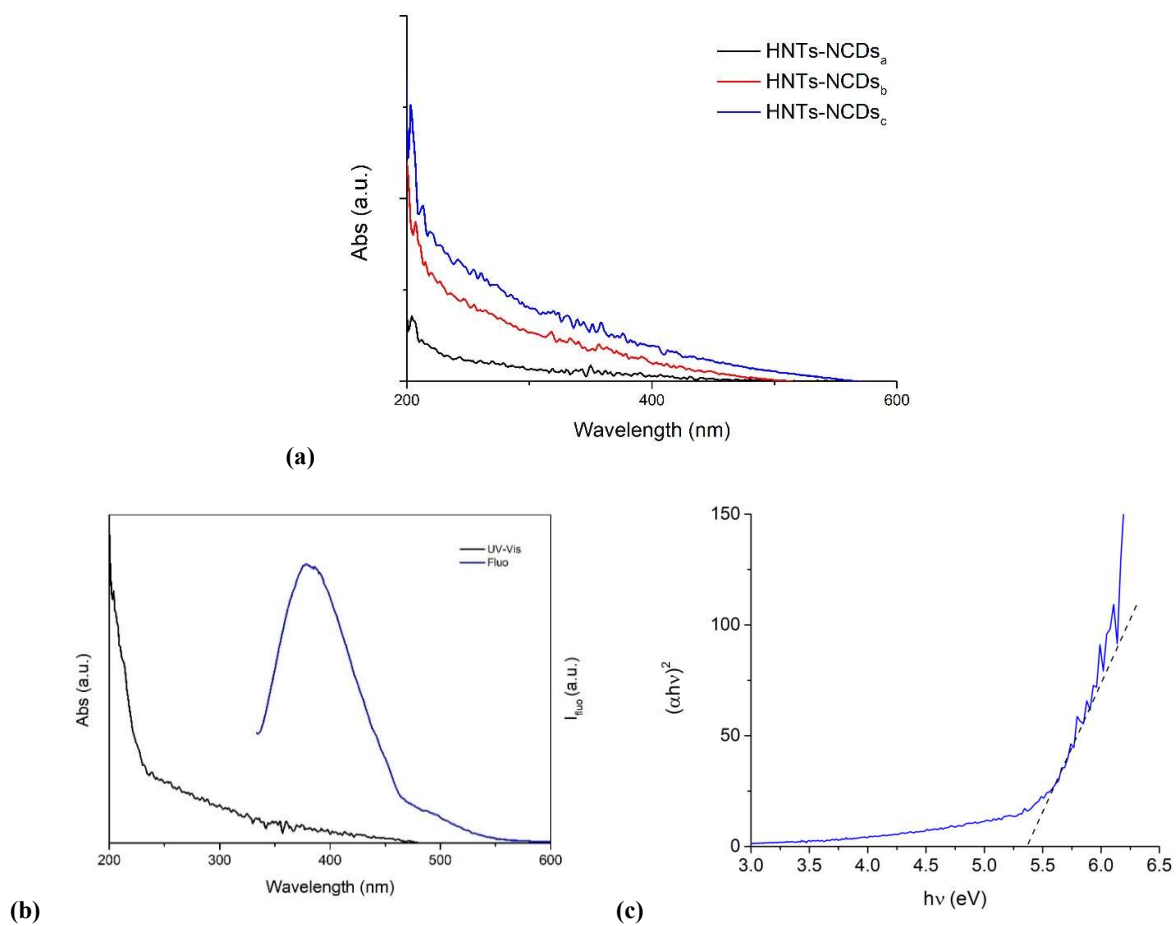

**Figure S10.** (a) Absorption spectra of HNTs-NCDs<sub>a-c</sub>; (b) Absorption and PL emission spectra HNTs-NCDs<sub>2</sub>, (c) Tauc plot of HNTs-NCDs<sub>2</sub>.

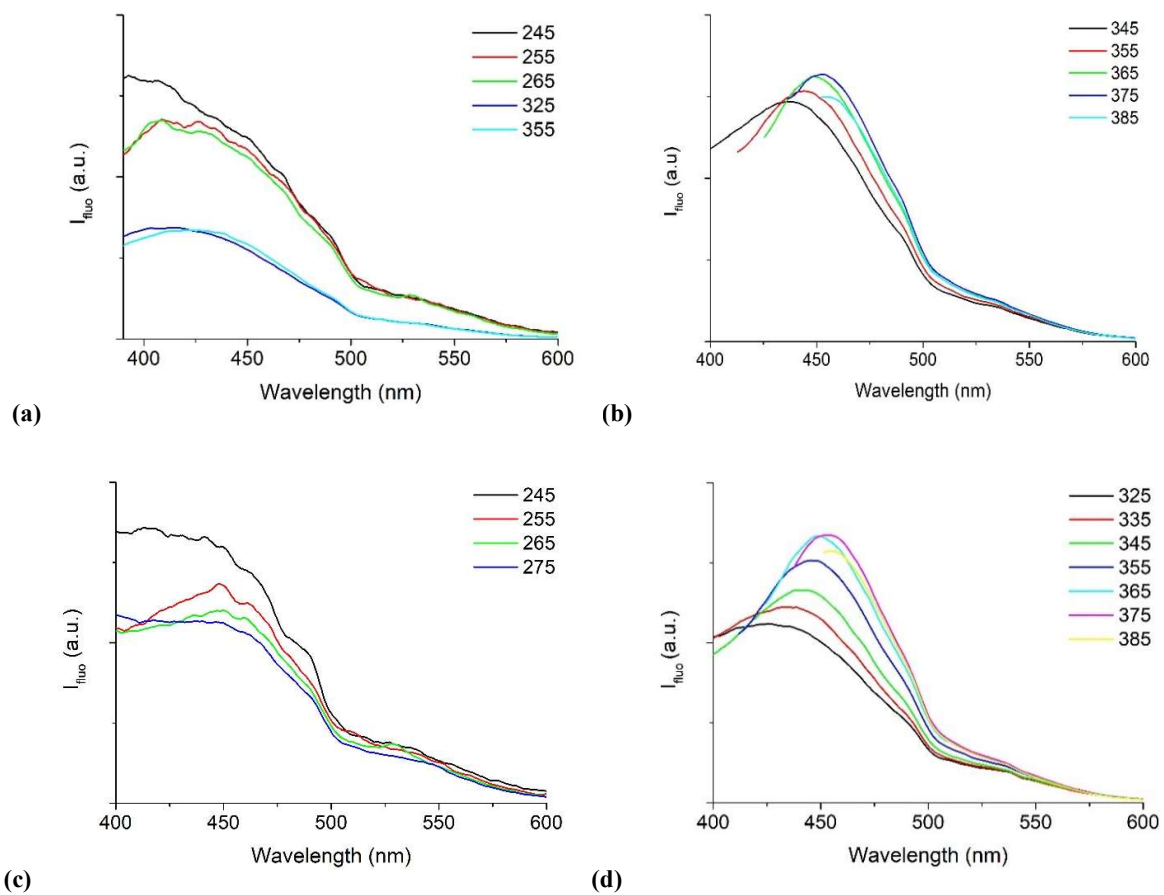

**Figure S11.** PL spectra in solution of HNTs-NCDs<sub>b</sub> (a-b) and HNTs-NCDs<sub>c</sub> (c-d) at different excitation wavelength.



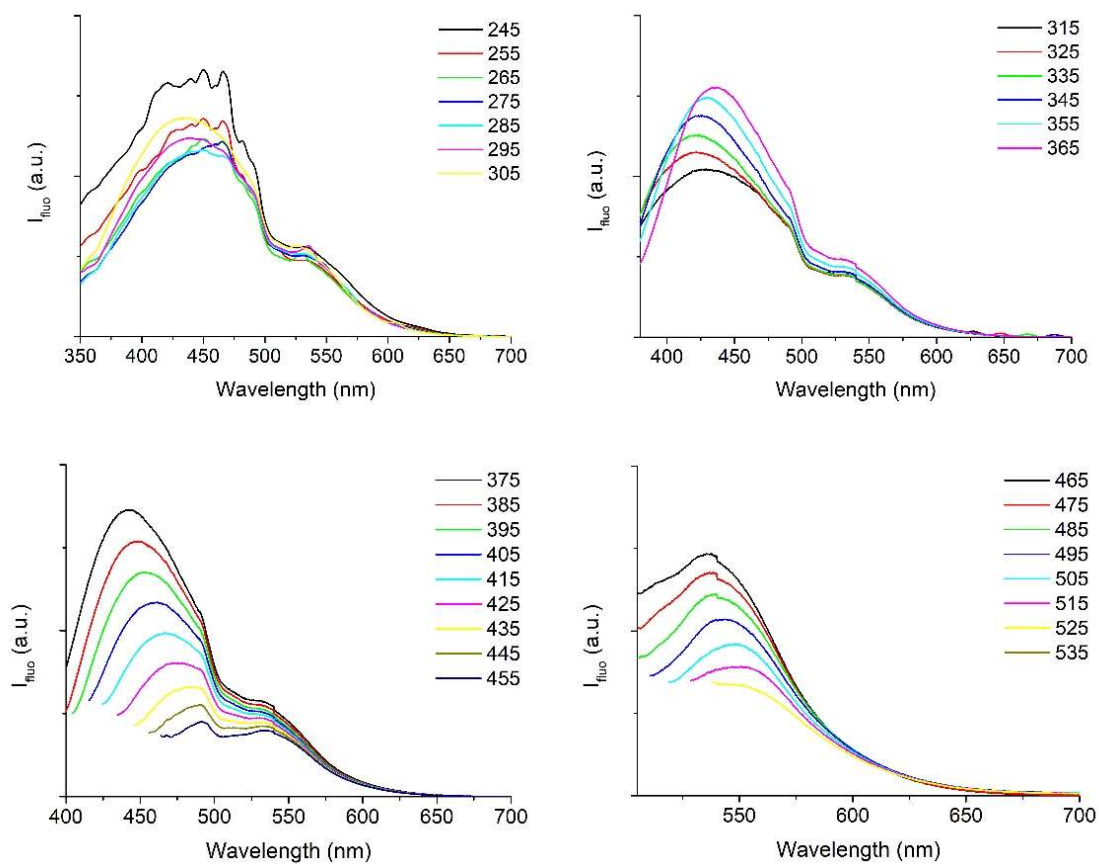

**Figure 12.** PL spectra solid state of HNTs-NCDs<sub>b</sub> at different excitation wavelength.

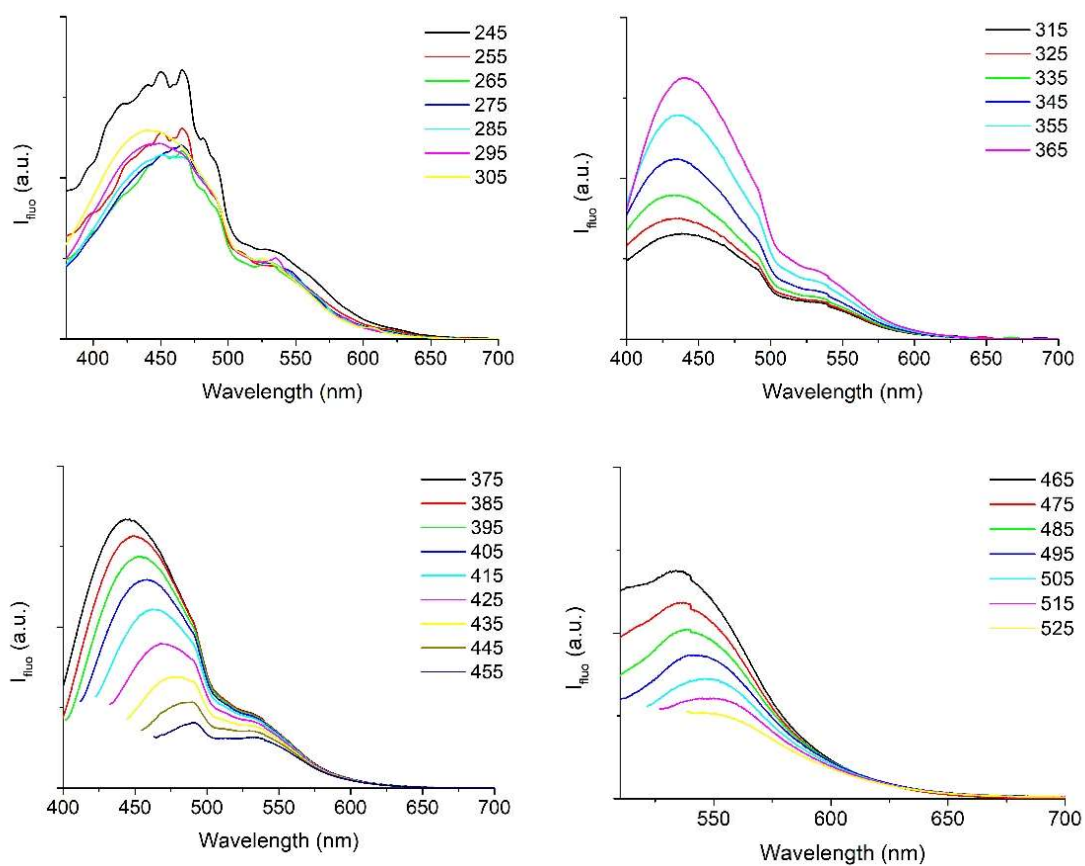

**Figure S13.** PL spectra solid state of HNTs-NCDs<sub>se</sub> at different excitation wavelength.

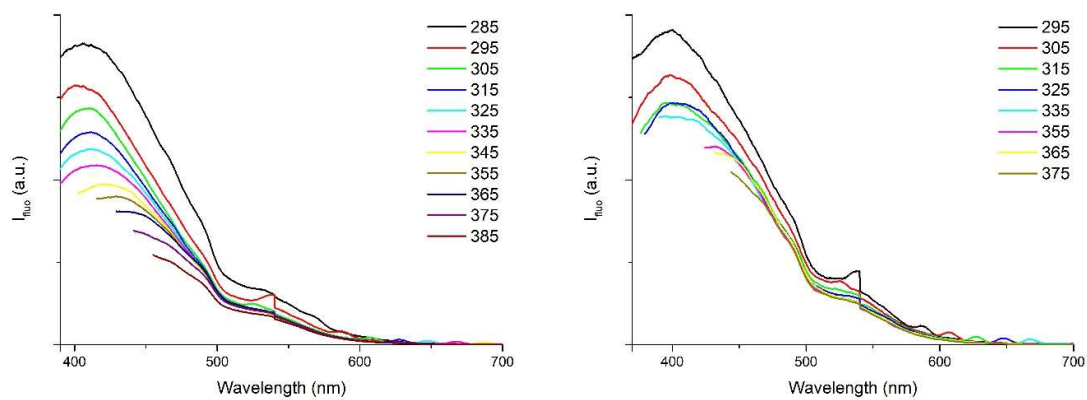

**Figure S14.** PL spectra in solution of (a) HNTs-NCDs1 and (b) HNTs-NCDs2.

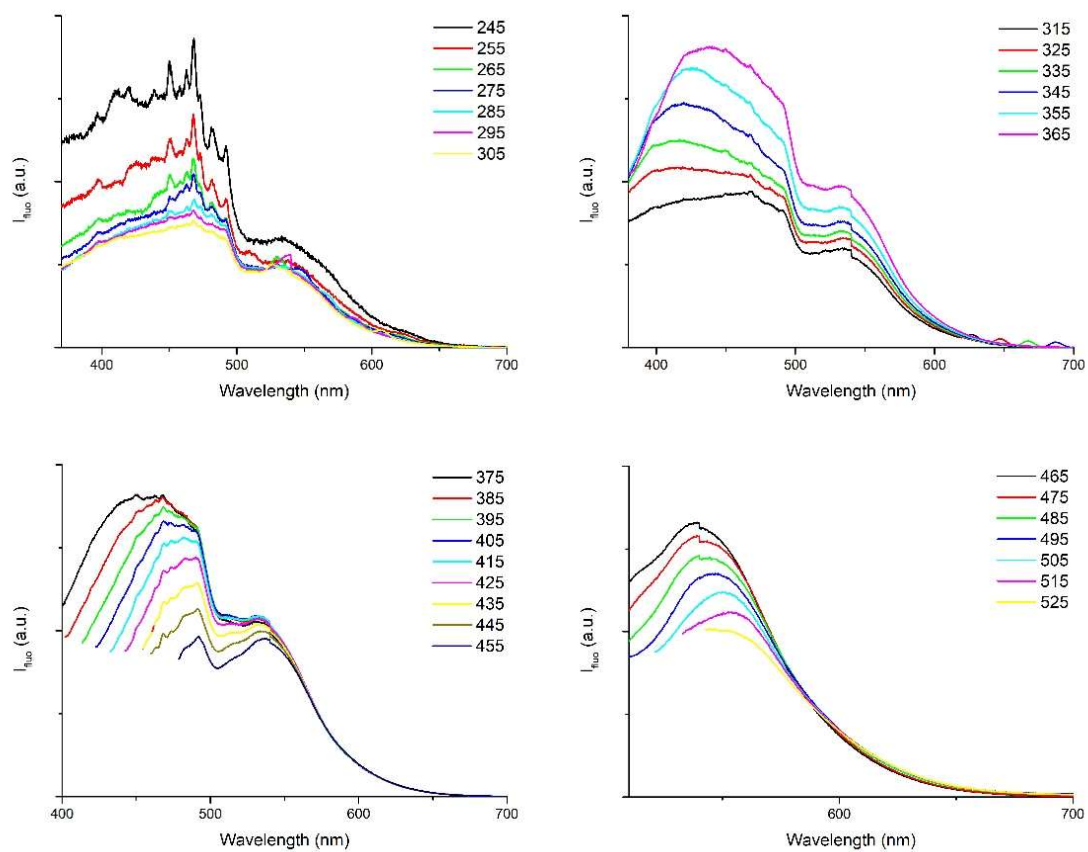

**Figure S15.** PL spectra solid state of HNTs-NCDs1 at different excitation wavelength.

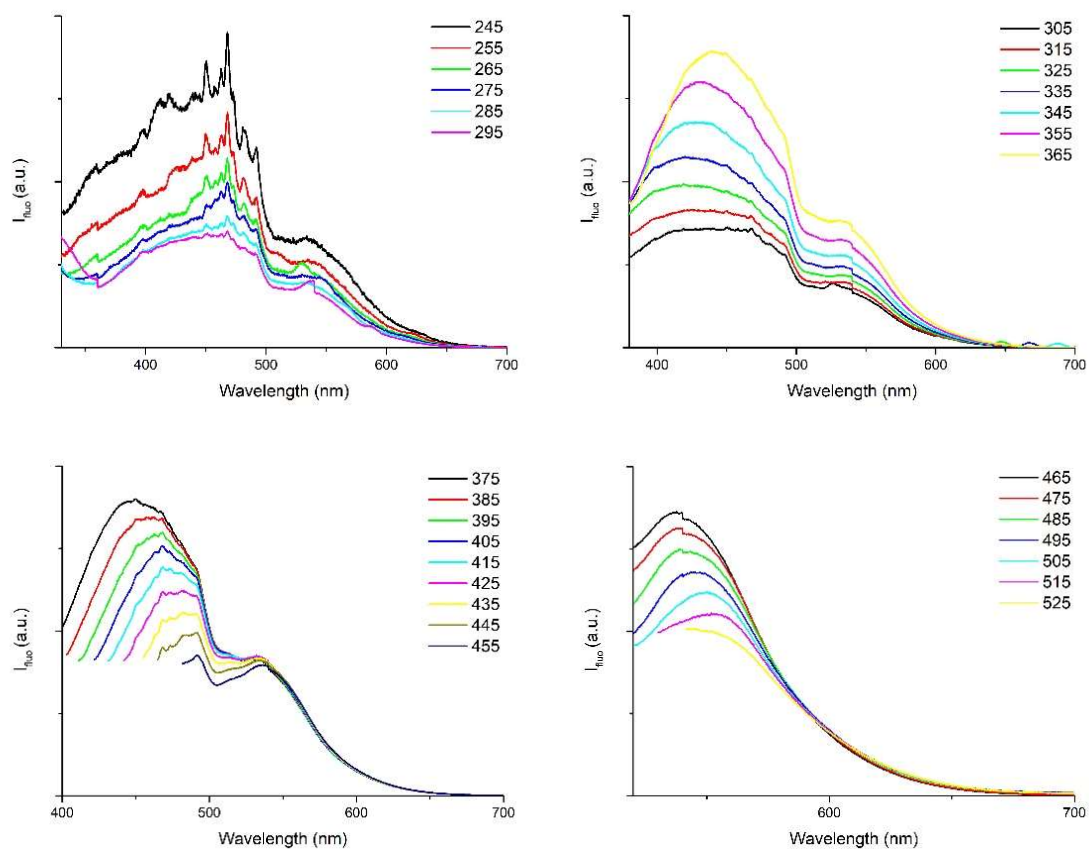

**Figure S16.** PL spectra solid state of HNTs-NCDs2 at different excitation wavelength.

## References

1. M. Massaro, P. Poma, G. Cavallaro, F. García-Villén, G. Lazzara, M. Notarbartolo, N. Muratore, R. Sánchez-Espejo, C. Viseras Iborra and S. Riela, *Colloids and Surfaces B: Biointerfaces*, 2022, **213**.
2. S. Zhong, C. Zhou, X. Zhang, H. Zhou, H. Li, X. Zhu and Y. Wang, *Journal of Hazardous Materials*, 2014, **276**, 58-65.
3. V. Ramanan, S. H. Subray and P. Ramamurthy, *New Journal of Chemistry*, 2018, **42**, 8933-8942.
4. F. Arcudi, L. Dordevic and M. Prato, *Angewandte Chemie - International Edition*, 2016, **55**, 2107-2112.
